CORRECTION

# Correction: Characterization of CD8<sup>+</sup> T Cell Differentiation following SIV $\Delta$ nef Vaccination by Transcription Factor Expression Profiling

The *PLOS Pathogens* Staff

## Notice of Republication

This article was republished on May 19, 2015, to correct the figures that were published in low resolution. This error was introduced during the typesetting process, and the publisher apologizes for the errors. Please download this article again to view the correct version.

## Reference

1. Billingsley JM, Rajakumar PA, Connole MA, Salisch NC, Adnan S, Kuzmichev YV, et al. (2015) Characterization of CD8<sup>+</sup> T Cell Differentiation following SIV $\Delta$ nef Vaccination by Transcription Factor Expression Profiling. *PLoS Pathog* 11(3): e1004740. doi: [10.1371/journal.ppat.1004740](https://doi.org/10.1371/journal.ppat.1004740) PMID: [25768938](https://pubmed.ncbi.nlm.nih.gov/25768938/)

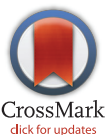

## OPEN ACCESS

**Citation:** The *PLOS Pathogens* Staff (2015) Correction: Characterization of CD8<sup>+</sup> T Cell Differentiation following SIV $\Delta$ nef Vaccination by Transcription Factor Expression Profiling. *PLoS Pathog* 11(6): e1004968. doi:10.1371/journal.ppat.1004968

**Published:** June 11, 2015

**Copyright:** © 2015 The PLOS Pathogens Staff. This is an open access article distributed under the terms of the [Creative Commons Attribution License](https://creativecommons.org/licenses/by/4.0/), which permits unrestricted use, distribution, and reproduction in any medium, provided the original author and source are credited.
